# Supplementary material for: Facile fabrication of WS2 nanocrystals confined in chlorella-derived N, P co-doped bio-carbon for sodium-ion batteries with ultra-long lifespan
Source: Royal Society of Chemistry journal article supplement (doi:10.1039/d1dt01582f), 2021-01-01
Supplement: d1dt01582f1.pdf [file d1dt01582f1.pdf]

## Supporting Information

### Facile fabrication of WS<sub>2</sub> nanocrystals confined in chlorella-derived N,P co-doped bio-carbon for sodium-ion batteries with ultra-long lifespan

Biyu Kang,<sup>‡a</sup> Yiyi Wang,<sup>‡a</sup> Xiaotong He,<sup>a</sup> Yaling Wu,<sup>\*b</sup> Xinye Li,<sup>a</sup> Chuyuan Lin,<sup>a</sup> Qinghua Chen,<sup>a</sup> Lingxing Zeng<sup>\*a, d, e</sup>, Mingdeng Wei,<sup>c</sup> and Qingrong Qian<sup>a, d, e</sup>

<sup>a</sup> Engineering Research Center of Polymer Green Recycling of Ministry of Education, College of Environmental Science and Engineering, Fujian Normal University, Fuzhou, Fujian 350007, China. EMAIL: zenglingxing@fjnu.edu.cn; Tel: +86-591 8346 5158

<sup>b</sup> Fujian Key Laboratory of Innate Immune Biology, Biomedical Research Center of South China, and College of Life Science, Fujian Normal University, Fuzhou, Fujian 350007, China. EMAIL: yaling\_wu@outlook.com.

<sup>c</sup> Fujian Provincial Key Laboratory of Electrochemical Energy Storage Materials, Fuzhou University, Fuzhou, Fujian 350002, China.

<sup>d</sup> Fujian Key Laboratory of Pollution Control & Resource Reuse, Fuzhou, Fujian 350007, China.

<sup>e</sup> Key Laboratory of Advanced Energy Materials Chemistry (Ministry of Education), College of Chemistry, Nankai University, Tianjin 300071, China.

<sup>‡</sup> These authors contributed equally to this work.

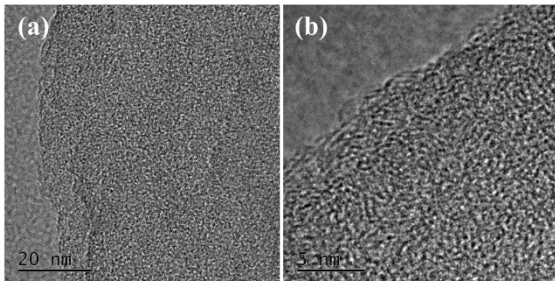

**Fig.S1** (a-b) HRTEM images of the NPC sample.

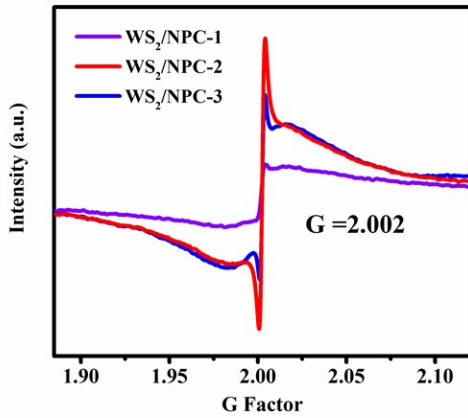

**Fig. S2** The EPR spectra of WS<sub>2</sub>/NPC-1, WS<sub>2</sub>/NPC-2 and WS<sub>2</sub>/NPC-3.

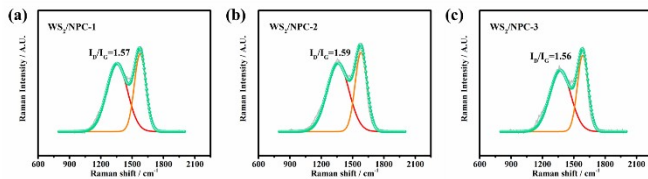

**Fig. S3** Fitted raman spectra curve of (a) WS<sub>2</sub>/NPC-1, (b) WS<sub>2</sub>/NPC-2 and (c) WS<sub>2</sub>/NPC-3 samples.

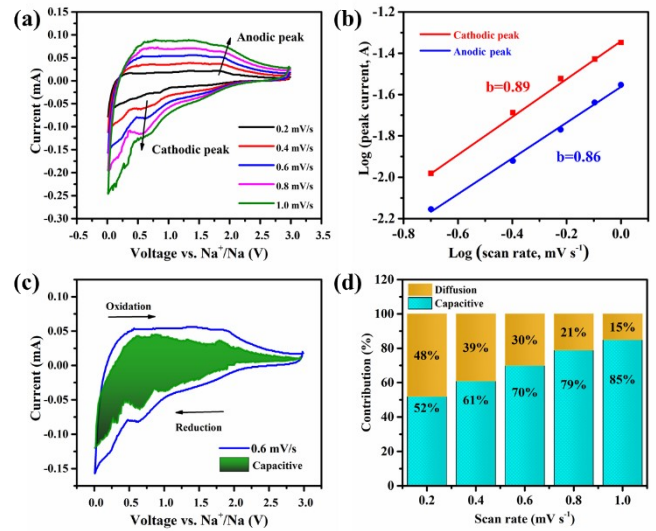

**Fig. S4** (a) Cyclic voltammetry profiles of WS<sub>2</sub>/NPC-2 electrode at ramping sweep rates from 0.2 to 1.0 mV s<sup>-1</sup>. (b) log(i) versus log(v) plots at different oxidation and reduction peaks. (c) Capacitive contribution (green region) of WS<sub>2</sub>/NPC-2 at 0.6 mV s<sup>-1</sup>. (d) The diffusion controlled and capacitive proportion of WS<sub>2</sub>/NPC-2 at different scan speeds.

**Table S1** The integral areas values of D and G peaks of the prepared samples measured from Raman results.

| Sample                 | I <sub>D</sub> | I <sub>G</sub> | I <sub>D</sub> /I <sub>G</sub> |
|------------------------|----------------|----------------|--------------------------------|
| WS <sub>2</sub> /NPC-1 | 70121.8        | 44627          | 1.57                           |
| WS <sub>2</sub> /NPC-2 | 74213.3        | 46602          | 1.59                           |
| WS <sub>2</sub> /NPC-3 | 63992          | 40895          | 1.56                           |

**Table S2** Summary of electrochemical behaviors of previous reports about WS<sub>2</sub> related anode materials for SIBs.

| Electrode materials                                 | Cycling capacity       | Current density      | Cycle numbers | References       |
|-----------------------------------------------------|------------------------|----------------------|---------------|------------------|
|                                                     | (mAh g <sup>-1</sup> ) | (A g <sup>-1</sup> ) |               |                  |
| WS <sub>2</sub> /CFC@C-P                            | 297                    | 2                    | 500           | 56               |
| Co <sub>9</sub> S <sub>8</sub> /WS <sub>2</sub> @NC | 355                    | 2                    | 120           | 24               |
| WS <sub>2</sub> /ZnS                                | 170.8                  | 5                    | 5000          | 28               |
| WS <sub>2</sub> @CNFs                               | 381                    | 0.2                  | 100           | 29               |
| High crystallinity WS <sub>2</sub>                  | 240                    | 5                    | 250           | 47               |
| PCS/WS <sub>2</sub> /NG                             | 205                    | 0.5                  | 900           | 23               |
| H-WS <sub>2</sub> @NC                               | 473                    | 0.1                  | 200           | 57               |
| WS <sub>2</sub> @S/N-C nanofibers                   | 319                    | 0.1                  | 100           | 42               |
|                                                     | 174                    | 5                    | 1000          |                  |
| WS <sub>2</sub> hollow microspheres                 | 285                    | 2                    | 2000          | 26               |
|                                                     | 363                    | 0.2                  | 400           |                  |
| WS <sub>2</sub> nanofibers                          | 226.5                  | 1                    | 800           | 48               |
|                                                     | 392.1                  | 0.2                  | 1000          |                  |
| NGQDs-WS <sub>2</sub> /3DCF                         | 392.1                  | 0.2                  | 1000          | 58               |
| WS <sub>2</sub> /NPC-2                              | <b>436</b>             | <b>0.1</b>           | <b>100</b>    | <b>This work</b> |
|                                                     | <b>302</b>             | <b>1</b>             | <b>2800</b>   |                  |
|                                                     | <b>154</b>             | <b>5</b>             | <b>6000</b>   |                  |

**Table S3** Impedance values fitted from an equivalent circuit model.

| Sample                 | R <sub>s</sub> (Ω) | R <sub>f</sub> (Ω) | R <sub>ct</sub> (Ω) |
|------------------------|--------------------|--------------------|---------------------|
| WS <sub>2</sub> /NPC-1 | 6.6                | 76.1               | 148.9               |
| WS <sub>2</sub> /NPC-2 | 5.6                | 61.7               | 104.4               |
| WS <sub>2</sub> /NPC-3 | 7.7                | 88.3               | 165.2               |
